# Supplementary material for: More Than 200 Genes Required for Methane Formation from H2and CO2and Energy Conservation Are Present inMethanothermobacter marburgensisandMethanothermobacter thermautotrophicus
Source: Hindawi journal article supplement (doi:10.1155/2011/973848), 2011-01-01
Supplement: f1 [file 973848.f1.pdf]

**More than 200 genes required for methane formation from H<sub>2</sub> and CO<sub>2</sub> and energy conservation in *Methanothermobacter marburgensis* and *M. thermautotrophicus* (21-02-11)**

**Anne-Kristin Kaster<sup>1</sup>, Meike Goenrich<sup>1</sup>, Henning Seedorf<sup>2</sup>, Heiko Liesegang<sup>3</sup>, Antje Wollherr<sup>3</sup>, Gerhard Gottschalk<sup>3</sup>, and Rudolf K. Thauer<sup>1\*</sup>**

<sup>1</sup> Max Planck Institute for Terrestrial Microbiology, 35043 Marburg, Germany

<sup>2</sup> Center for Genome Sciences and Systems Biology, Washington University School of Medicine, St. Louis MO 63108, USA

<sup>3</sup> Göttingen Genomics Laboratory, Institute of Microbiology and Genetics, Georg August University, 37077 Göttingen, Germany

\* Corresponding author: Prof. Dr. R. Thauer (thauer@mpi-marburg.mpg.de)

### **Sequencing**

Sequencing of the *M. marburgensis* genome was done in a combined Sanger/454-Pyrosequencing approach. 454 sequencing resulted in 216,097 reads giving ~52 Mbp sequencing data corresponding to a 32X coverage. In addition 6,000 genomic fragments were cloned into the TOPO TA vector (Quiagen, Hilden) and sequenced on a ABI 3730 capillary sequencer from both ends. The ABI sequences resulted in 11808 reads corresponding to an additional coverage of 7.4X. Remaining gaps were closed by sequences generated on gap spanning PCR products by an ABI 3730 capillary sequencer. The overall quality was set to a minimum confidence of PHRED 45 for the complete genome [1].

### **Data basis**

The data basis for the comparison comprised the genome sequences of the following Archaea: *Methanothermobacter marburgensis* (NC\_014408/CP001710), *Methanothermobacter thermautotrophicus* (NC\_000916), *Methanosphaera stadtmanae* (NC\_007681), *Methanobrevibacter smithii* ATCC35061 (NC\_009515),

*Methanobrevibacter ruminantium* M1 (NC\_013790), *Methanocaldococcus jannaschii* (NC\_000909), *Methanococcus aeolicus* Nankai-3 (NC\_009635), *Methanococcus maripaludis* S2 (NC\_005791), *Methanococcus vanniellii* SB (NC\_009634), *Methanocorpusculum labreanum* Z (NC\_008942), *Methanopyrus kandleri* AV19 (NC\_003551), *Methanosarcina mazei* Gö1 (NC\_003901), *Methanosarcina acetivorans* C2A (NC\_993552), *Methanosarcina barkeri* Fusaro (NC\_007355), *Archaeoglobus fulgidus* (NC\_000917), *Hyperthermus butylics* (NC\_008818), *Picrophilus torridus* (AE017261), *Pyrobaculum aerophilum* IM2 (NC\_003364), *Sulfolobus solfataricus* P2 (NC\_002754), *Thermoplasma acidophilum* (NC\_002578), *Halobacterium* sp. NRC-1 (NC\_002607) and *Methanocella paludicola* gen. Nov., sp. nov. (formally “uncultured methanogenic archaeon RC-I”) (AM114193). Where indicated, genome comparisons were extended to sequences of other Archaea, Bacteria and Eukarya from the NCBI data bases. The comparisons were completed in May 2010.

### **Methanogen specific CDS**

In the methanogens sequenced to date there are 27 CDS and 7 homologous pairs of CDS found in every methanogen but not in non methanogens. These are listed in Supplementary Table 1.

### **CDS not in common**

In order to trace back the origin of the CDS in *M. marburgensis* and *M. thermautotrophicus* not in common we looked for all homologous sequences in the two genomes and whether the homologs are also found in the genomes of other Archaea. Based on this analysis the CDS not in common are interpreted to be the result of gene splitting (frame shifts caused by single base insertion/deletion), gene deletion-, gene duplication-, and lateral gene transfer events that have occurred in only one of the two organisms since they descended from their most recent common ancestor.

**Putative gene splitting events:** Of the 145 CDS in *M. marburgensis* not in common (Supplementary Table 2) there are 22 CDS with hits to CDS in *M. thermautotrophicus* that themselves show a best hit to another CDS in *M. marburgensis*. These CDS not in

common all turned out to be the result of gene splitting events. Examples are the split genes for one of the ribosome proteins (MTBMA\_c05290 + MTBMA\_c05280 = MTH39), for a nucleoside-diphosphate-sugar transferase (MTBMA\_c03360 + 03350 = MTH1759), for subunit D of pyruvate synthase (MTBMA\_c03160 + MTBMA\_c03150 = MTH1740), for a histone acetyltransferase (MTBMA\_c12130 + MTBMA\_c12140 = MTH817), for subunit A of 2-oxoisovalerate synthase (MTBMA\_c10930 + MTBMA\_c10920 = MTH705), for a cobalto chelatase (MTBMA\_c10570 + MTBMA\_c10560 + MTBMA\_c10550 = MTH673), and for adenosylcobalamin dependent ribonucleotide-diphosphate reductase (MTBMA\_c10320 + MTBMA\_c10330 = MTH652). The split of proteins in two is not necessarily associated with a loss of function as evidenced for F<sub>420</sub>-non-reducing hydrogenase from *Methanococcus voltae* [2] and for a tRNA from *Nanoarchaeum equitans* [3]. In *M. thermautotrophicus* 46 of the 266 CDS not in common belong to split genes (Supplementary Table 3). It has to be considered that of the annotated “split genes” some may be the result of sequencing errors.

**Putative gene deletion events:** In *M. marburgensis* 44 of the 145 CDS not in common (Supplementary Table 2) are hypothetical proteins that do not show sequence similarities to other CDS in *M. marburgensis*, to any CDS in *M. thermautotrophicus* and to CDS in any other organisms. *Vice versa*, in *M. thermautotrophicus* 67 of the 266 CDS not in common (Supplementary Table 3) are for hypothetical proteins that do not show sequence similarity to other CDS in *M. thermautotrophicus*, to any CDS in *M. marburgensis* or to any CDS in other organism. These 111 (44 + 67) CDS not in common are therefore most probably the results of gene deletion events in the two organisms. The genomes of *M. marburgensis* and *M. thermautotrophicus* have 177 CDS in common that are not found in any other organisms. Therefore, the most recent common ancestor of the two *Methanothermobacter* species must have had at least 288 (177 + 111) ancestor-specific CDS.

**Putative gene duplication events:** In *M. marburgensis* 44 of the 145 CDS not in common (Supplementary Table 2) only show sequence similarity to other CDS present in *M. marburgensis* indicating that these 44 CDS were generated by gene duplication or

partial gene duplication events. Five of these are associated with IS-like elements, 32 of the 44 CDS are proteins with annotated function, 10 CDS are hypothetical proteins and 2 are conserved hypothetical proteins. In *M. thermotrophicus* there are 80 CDS not in common that only show sequence similarities to other CDS in *M. thermotrophicus* (Supplementary Table 3).

In *M. thermotrophicus* one of the gene duplicates, namely that for an annotated cation-transporting P-ATPase PacL (MTH1001  $\triangleq$  MTH481 + MTH482), might have led to an uninhibited membrane-associated ATPase which could explain why the membrane fraction of *M. thermotrophicus* exhibits much higher ATPase activity than the membrane fraction of *M. marburgensis*. Of possible functional interest is also that in *M. marburgensis* the genes for CdhA (MTBMA\_c14220 + 14210 + 14200  $\triangleq$  MTBMA\_c02870) and CdhB (MTBMA\_c14190  $\triangleq$  MTBMA\_c02880) of the acetyl-CoA synthase/CO dehydrogenase complex are duplicated. It therefore could be possible that in *M. marburgensis* part of the acetyl-CoA synthase/decarbonylase complex, one of the key enzyme complexes involved in CO<sub>2</sub> assimilation, is existing twice, contributing to the ability of *M. marburgensis* to grow more rapidly or to regulate CO<sub>2</sub> fixation differently than *M. thermotrophicus*. However, expression data supporting this contention are not available.

**Putative lateral gene transfer events:** In *M. marburgensis* 35 of the 145 CDS not in common and in *M. thermotrophicus* 72 of the 266 CDS not in common do not show sequence similarity to any CDS in *M. marburgensis* or *M. thermotrophicus* but to CDS in other archaea and bacteria and are therefore considered to have been acquired via lateral gene transfer (Supplementary Tables 2 and 3): . In *M. marburgensis*, amongst the 35 CDS are 2 CDS (MTBMA\_c01250 and MTBMA\_c01240) for a putative transposase which is functionally associated with the IS-like elements that are lacking in *M. thermotrophicus*. In *M. thermotrophicus*, amongst the 73 CDS are 18 for CRISPR associated proteins (Cas) (MTH325-327, MTH1076-1088 and MTH1091) of which 17 are lacking in *M. marburgensis* (Table1).

## Literature

- [1] Liesegang, H., A.K. Kaster, A. Wiezer, M. Goenrich, A. Wollherr, H. Seedorf, G. Gottschalk, and R.K. Thauer, "Complete genome sequence of *Methanothermobacter marburgensis*, a methanoarchaeon model organism", *J. Bacteriol.*, vol. 192, no. 21, pp. 5850-5851, 2010.
- [2] Bingemann, R., A.J. Pierik, and A. Klein, "Influence of the fusion of two subunits of the F<sub>420</sub>-non-reducing hydrogenase of *Methanococcus voltae* on its biochemical properties", *Arch. Microbiol.*, vol. 174, no. 5, pp. 375-378, 2000.
- [3] Randau, L., R. Munch, M.J. Hohn, D. Jahn, and D. Soll, "*Nanoarchaeum equitans* creates functional tRNAs from separate genes for their 5'- and 3'-halves", *Nature*, vol. 433, no. 7025, pp. 537-541, 2005.
- [4] Thoma, C., M. Frank, R. Rachel, S. Schmid, D. Nather, G. Wanner, and R. Wirth, "The Mth60 fimbriae of *Methanothermobacter thermoautotrophicus* are functional adhesins", *Environ. Microbiol.*, vol. 10, no. 10, pp. 2785-2795, 2008.

**Supplementary Table 1: The 27 protein encoding sequences (CDS) and 7 CDS homolog pairs found in all methanogenic archaea but not in non methanogens**

| CDS                                                                     | Annotation                                                                                                  |
|-------------------------------------------------------------------------|-------------------------------------------------------------------------------------------------------------|
| <b>CDS found in all methanogenic archaea but not in non methanogens</b> |                                                                                                             |
| MTBMA_c00280 / MTH1441                                                  | conserved hypothetical protein (putative kinase)                                                            |
| MTBMA_c01050 / MTH1522                                                  | nitrogenase molybdenum-iron protein related (NfID)                                                          |
| MTBMA_c01600 / MTH1574                                                  | conserved hypothetical protein (methanogenesis marker protein 8)                                            |
| MTBMA_c01760 / MTH1590                                                  | phosphomannomutase related protein                                                                          |
| MTBMA_c02630 / MTH1684                                                  | conserved hypothetical protein containing a ferredoxin domain                                               |
| MTBMA_c04350 / MTH1864                                                  | SeID-related protein                                                                                        |
| MTBMA_c04360 / MTH1865                                                  | peptidyl-prolyl cis-trans isomerase related protein                                                         |
| MTBMA_c04370 / MTH1866                                                  | conserved hypothetical protein (methanogenesis marker protein 6)                                            |
| MTBMA_c04390 / MTH1868                                                  | conserved hypothetical protein (methanogenesis marker protein 5)                                            |
| MTBMA_c04410 / MTH1870                                                  | conserved hypothetical protein (methanogenesis marker protein 17)                                           |
| MTBMA_c04420 / MTH1871                                                  | NifB-related protein                                                                                        |
| MTBMA_c06800 / MTH231                                                   | methyltransferase related protein (MtxX)                                                                    |
| MTBMA_c12680 / MTH873                                                   | UDP-N-acetylmuramyl pentapeptide synthase related protein (MurF)                                            |
| MTBMA_c13710 / MTH987                                                   | conserved hypothetical protein                                                                              |
| MTBMA_c13960 / MTH1014                                                  | predicted metal-binding transcription factor                                                                |
| MTBMA_c15370 / MTH1153                                                  | conserved hypothetical protein (putative cobalt transport protein)                                          |
| MTBMA_c15430 / MTH1159                                                  | N <sup>5</sup> -methyltetrahydromethanopterin: coenzyme M methyltransferase, subunit A (EC 2.1.1.86) (MtrA) |
| MTBMA_c15440 / MTH1160                                                  | N <sup>5</sup> -methyltetrahydromethanopterin: coenzyme M methyltransferase, subunit B (EC 2.1.1.86) (MtrB) |
| MTBMA_c15450 / MTH1161                                                  | N <sup>5</sup> -methyltetrahydromethanopterin: coenzyme M methyltransferase, subunit C (EC 2.1.1.86) (MtrC) |
| MTBMA_c15460 / MTH1162                                                  | N <sup>5</sup> -methyltetrahydromethanopterin: coenzyme M methyltransferase, subunit D (EC 2.1.1.86) (MtrD) |
| MTBMA_c15470 / MTH1163                                                  | N <sup>5</sup> -methyltetrahydromethanopterin: coenzyme M methyltransferase, subunit E (EC 2.1.1.86) (MtrE) |
| MTBMA_c15500 / MTH1666                                                  | methyl coenzyme M reductase I operon associated protein (McrC)                                              |
| MTBMA_c15570 / MTH1180                                                  | methyl-coenzyme M reductase II operon associated protein (MtrC)                                             |
| MTBMA_c15850 / MTH1207                                                  | sulfo-pyruvate decarboxylase, beta subunit (EC 4.1.1.79) (ComE)                                             |
| MTBMA_c16830 / MTH1297                                                  | F <sub>420</sub> -reducing hydrogenase, subunit beta (EC 1.12.98.1) (FrhB)                                  |
| MTBMA_c16840 / MTH1296                                                  | F <sub>420</sub> -reducing hydrogenase, subunit gamma (EC 1.12.98.1) (FrhG)                                 |
| MTBMA_c17770 / MTH1391                                                  | predicted DNA-binding protein                                                                               |

**CDS of homolog pairs with at least one being found in all methanogenic archaea but not in non methanogens**

|                                 |                                                                   |
|---------------------------------|-------------------------------------------------------------------|
| MTBMA_c02820 / MTH1703          | conserved hypothetical protein (putative membrane protein)        |
| MTBMA_c13650 / MTH980           | conserved hypothetical protein (putative membrane protein)        |
| MTBMA_c09140 / MTH126           | conserved hypothetical protein                                    |
| MTBMA_c00070 / MTH1418          | conserved hypothetical protein                                    |
| MTBMA_c15480 / MTH1164          | methyl-coenzyme M reductase I, subunit alpha (EC 2.8.4.1) (McrA)  |
| MTBMA_c15120 / MTH1129          | methyl-coenzyme M reductase II, subunit alpha (EC 2.8.4.1) (MrtA) |
| MTBMA_c15490 / MTH1165          | methyl-coenzyme M reductase I, subunit gamma (EC 2.8.4.1) (McrG)  |
| MTBMA_c15130 / MTH1130          | methyl-coenzyme M reductase II, subunit gamma (EC 2.8.4.1) (MrtG) |
| MTBMA_c15510 / MTH1167          | methyl-coenzyme M reductase I, subunit delta (EC 2.8.4.1) (McrD)  |
| MTBMA_c15140 / MTH1131          | methyl-coenzyme M reductase II, subunit delta (EC 2.8.4.1) (MrtD) |
| MTBMA_c15520 / MTH1168          | methyl-coenzyme M reductase I, subunit beta (EC 2.8.4.1) (McrB)   |
| MTBMA_c15150 / MTH1132          | methyl-coenzyme M reductase II, subunit beta (EC 2.8.4.1) (MrtB)  |
| MTBMA_c13970 / MTH1015          | methyl-coenzyme M reductase, component A2 (AtwA1)                 |
| MTBMA_c06010 / MTH454 (and 151) | methyl-coenzyme M reductase, component A2 (AtwA2) homolog         |

---

**Supplementary Table 2: The 145 CDS in the genome of *Methanothermobacter marburgensis* not found in the genome of *M. thermotrophicus* with the "most similar CDS method".** This method allows the use of a sequence in the comparison only once. Neither the second or third best hits nor CDS homologs within the same organism are revealed. A sequence not in common does therefore not mean that there are no paralogs or orthologs of this sequence within the two organisms. The homologs given in this table were also found by considering significant hits (E value cut-off of e-8) to other CDS in *M. thermotrophicus* and by considering CDS homologs within *M. marburgensis*. The CDS highlighted with bold numbers are associated with IS-like elements.

| CDS                                                                                  | Annotation                                                                | Homologs                                                                             |
|--------------------------------------------------------------------------------------|---------------------------------------------------------------------------|--------------------------------------------------------------------------------------|
| <b>Putative gene splitting events: neighboring CDS with second or third best hit</b> |                                                                           |                                                                                      |
| MTBMA_c01170                                                                         | predicted hydrolase (80aa)                                                | MTBMA_c01160 (338aa) + MTBMA_c01170 (80aa) = MTH1534 (424aa)                         |
| MTBMA_c02470                                                                         | predicted transcription initiation factor IIE, alpha subunit (35aa)       | MTBMA_c02480 (85aa) + MTBMA_c02470 (35aa) = part of MTH1669 (178aa)                  |
| MTBMA_c03150                                                                         | 2-oxopropionate (pyruvate) synthase, subunit D (EC 1.2.7.1) (porD) (81aa) | MTBMA_c03160 (177aa) + MTBMA_c03150 (81aa) = MTH1740 (261aa)                         |
| MTBMA_c03360                                                                         | predicted nucleoside-diphosphate-sugar transferase (EC 2.7.-.-) (141aa)   | MTBMA_c03360 (141aa) + MTBMA_c03350 (256aa) = MTH1759 (385aa)                        |
| MTBMA_c03720                                                                         | predicted ATP-dependent helicase (427aa)                                  | MTBMA_c03730 (441aa) + MTBMA_c03720 (427aa) = MTH1802 (862aa)                        |
| MTBMA_c04120                                                                         | predicted hydrolase (93aa)                                                | MTBMA_c04130 (166aa) + MTBMA_c04120 (93aa) = MTH1842 (235aa)                         |
| MTBMA_c04190                                                                         | conserved hypothetical protein (84aa)                                     | MTBMA_c04190 (84aa) + MTBMA_c04180 (259aa) = MTH1848 (365aa)                         |
| MTBMA_c05290                                                                         | 30S ribosomal protein S9P (rps9p) (133aa)                                 | MTBMA_c05290 (133aa) + MTBMA_c05280 (140aa) = MTH39 (282aa)                          |
| MTBMA_c05530                                                                         | predicted transporter protein (93aa)                                      | MTBMA_c05530 (93aa) + MTBMA_c05520 (308aa) = part of MTH104 (459aa)                  |
| MTBMA_c05720                                                                         | predicted sensory transduction histidine kinase (49aa)                    | MTBMA_c05730 (287aa) + MTBMA_c05720 (49aa) = MTH123 (356aa)                          |
| MTBMA_c06540                                                                         | conserved hypothetical protein (140aa)                                    | MTBMA_c06540 (140aa) + MTBMA_c06530 (205aa) = MTH204 (338aa)                         |
| MTBMA_c10070                                                                         | conserved hypothetical protein (41aa)                                     | MTBMA_c10080 (88aa) + MTBMA_c10070 (41aa) = MTH626 (128aa)                           |
| MTBMA_c10140                                                                         | conserved hypothetical protein (171aa)                                    | MTBMA_c10130 (531aa) + MTBMA_c10140 (171aa) = MTH632 (643aa)                         |
| MTBMA_c10320                                                                         | predicted ribonucleoside-diphosphate reductase, large subunit (144aa)     | MTBMA_c10330 (573aa) + MTBMA_c10320 (144aa) = MTH652 (703aa)                         |
| MTBMA_c10550                                                                         | cobalto chelatase subunit-likeprotein (604aa)                             | MTBMA_c10570 (195aa) + MTBMA_c10560 (849aa) + MTBMA_c10550 (604aa) = MTH673 (1708aa) |
| MTBMA_c10570                                                                         | cobalto chelatase subunit-like protein (195aa)                            | MTBMA_c10570 (195aa) + MTBMA_c10560 (849aa) + MTBMA_c10550 (604aa) = MTH673 (1708aa) |
| MTBMA_c10600                                                                         | predicted methyltransferase (EC 2.1.1.-) (121aa)                          | MTBMA_c10610 (165aa) + MTBMA_c10600 (121aa) = MTH675 (266aa)                         |
| MTBMA_c10920                                                                         | 2-oxoisovalerate synthase, subunit A (EC 1.2.7.7) (vorA1) (93aa)          | MTBMA_c10930 (381aa) + MTBMA_c10920 (93aa) = MTH705 (477aa)                          |
| MTBMA_c11570                                                                         | conserved hypothetical protein (95aa)                                     | MTBMA_c11570 (95aa) + MTBMA_c11560 (154aa) = MTH762 (256aa)                          |
| MTBMA_c12130                                                                         | predicted histone acetyltransferase (EC 2.3.1.48) (188aa)                 | MTBMA_c12140 (348aa) + MTBMA_c12130 (188aa) = MTH817 (545aa)                         |
| MTBMA_c15690                                                                         | conserved hypothetical protein (71aa)                                     | MTBMA_c15690 (71aa) + MTBMA_c15700 (158aa) = MTH1192 (242aa)                         |
| MTBMA_c17860                                                                         | conserved hypothetical protein (78aa)                                     | MTBMA_c17860 (78aa) + MTBMA_c17870 (174aa) = MTH1400 (261aa)                         |

**Putative gene deletion events: no homologs found in *M. marburgensis* and any other organism used in the comparison**

|              |                              |           |
|--------------|------------------------------|-----------|
| MTBMA_c00790 | hypothetical protein (54aa)  | not found |
| MTBMA_c00870 | hypothetical protein (54aa)  | not found |
| MTBMA_c01150 | hypothetical protein (91aa)  | not found |
| MTBMA_c01850 | hypothetical protein (56aa)  | not found |
| MTBMA_c03860 | hypothetical protein (124aa) | not found |
| MTBMA_c04320 | hypothetical protein (47aa)  | not found |
| MTBMA_c04690 | hypothetical protein (57aa)  | not found |
| MTBMA_c05630 | hypothetical protein (49aa)  | not found |
| MTBMA_c07340 | hypothetical protein (71aa)  | not found |
| MTBMA_c07370 | hypothetical protein (146aa) | not found |
| MTBMA_c07380 | hypothetical protein (155aa) | not found |
| MTBMA_c07460 | hypothetical protein (87aa)  | not found |



|              |                                               |                            |
|--------------|-----------------------------------------------|----------------------------|
| MTBMA_c07560 | predicted transcriptional regulator (132aa)   | not found                  |
| MTBMA_c07570 | hypothetical protein (85aa)                   | not found                  |
| MTBMA_c07580 | hypothetical protein (185aa)                  | not found                  |
| MTBMA_c08150 | conserved hypothetical protein (83aa)         | fragment of MTH420 (676aa) |
| MTBMA_c08160 | hypothetical protein (76aa)                   | not found                  |
| MTBMA_c08480 | cobalto chelatase subunit-likeprotein (109aa) | fragment of MTH456 (859aa) |
| MTBMA_c08490 | cobalto chelatase subunit-likeprotein (51aa)  | fragment of MTH456 (859aa) |
| MTBMA_c08540 | hypothetical protein (63aa)                   | not found                  |
| MTBMA_c08560 | hypothetical protein (35aa)                   | fragment of MTH469 (288aa) |
| MTBMA_c08620 | hypothetical protein (102aa)                  | not found                  |
| MTBMA_c08780 | hypothetical protein (94aa)                   | not found                  |
| MTBMA_c08880 | hypothetical protein (366aa)                  | not found                  |
| MTBMA_c08890 | hypothetical protein (166aa)                  | not found                  |
| MTBMA_c09020 | hypothetical protein (279aa)                  | not found                  |
| MTBMA_c09970 | hypothetical protein (190aa)                  | not found                  |
| MTBMA_c10440 | hypothetical protein (53aa)                   | not found                  |
| MTBMA_c10590 | hypothetical protein (50aa)                   | not found                  |
| MTBMA_c10980 | hypothetical protein (47aa)                   | not found                  |
| MTBMA_c11010 | hypothetical protein (61aa)                   | not found                  |
| MTBMA_c11050 | hypothetical protein (81aa)                   | not found                  |
| MTBMA_c11640 | hypothetical protein (46aa)                   | not found                  |
| MTBMA_c12210 | hypothetical protein (82aa)                   | not found                  |
| MTBMA_c14650 | hypothetical protein (117aa)                  | not found                  |
| MTBMA_c14660 | hypothetical protein (99aa)                   | not found                  |
| MTBMA_c14670 | hypothetical protein (53aa)                   | not found                  |
| MTBMA_c14680 | hypothetical protein (63aa)                   | not found                  |
| MTBMA_c14730 | hypothetical protein (173aa)                  | not found                  |
| MTBMA_c14800 | hypothetical protein (62aa)                   | not found                  |
| MTBMA_c15250 | hypothetical protein (51aa)                   | not found                  |
| MTBMA_c15940 | surface protease related protein (62aa)       | not found                  |
| MTBMA_c16530 | hypothetical protein (109aa)                  | not found                  |
| MTBMA_c17290 | hypothetical protein (130aa)                  | not found                  |

**Putative gene duplication events: two or more homologs in *M. marburgensis* where only one is found in *M. thermotrophicus***

|                     |                                                                                          |                                         |
|---------------------|------------------------------------------------------------------------------------------|-----------------------------------------|
| <b>MTBMA_c00770</b> | predicted DNA methylase (881aa)                                                          | 0 relative to MTBMA_c09340 (886aa)      |
| MTBMA_c04680        | oligosaccharyl transferase STT3 subunit related protein (706aa)                          | 3e-148 relative to MTBMA_c04670 (694aa) |
| MTBMA_c04720        | conserved hypothetical protein (59aa)                                                    | 9e-14 relative to MTBMA_c04700 (61aa)   |
| MTBMA_c05450        | conserved hypothetical protein (773aa)                                                   | 0 relative to MTBMA_c10580 (964aa)      |
| MTBMA_c06050        | predicted pseudomurein-binding protein (837aa)                                           | 8e-92 relative to MTBMA_c07430 (874aa)  |
| MTBMA_c06470        | predicted efflux pump protein (455aa)                                                    | 7e-145 relative to MTBMA_c06460 (458aa) |
| MTBMA_c07330        | predicted nickel responsive regulator (nikR) (142aa)                                     | 2e-60 relative to MTBMA_c11340 (140aa)  |
| MTBMA_c07420        | predicted pseudomurein-binding protein (611aa)                                           | 1e-159 relative to MTBMA_c07430 (874aa) |
| MTBMA_c07690        | predicted glycosyltransferase (EC 2.4.1.-) (382aa)                                       | 3e-11 relative to MTBMA_c08450 (363aa)  |
| MTBMA_c08790        | predicted sensory transduction histidine kinase (655aa)                                  | 4e-65 relative to MTBMA_c06270 (787aa)  |
| <b>MTBMA_c09340</b> | predicted adenine-specific DNA methylase (EC 2.1.1.72)(886aa)                            | 0 relative to MTBMA_c00770 (881aa)      |
| MTBMA_c09380        | tetratricopeptide repeat domain-containing protein (416aa)                               | 7e-23 relative to MTBMA_c11120 (406aa)  |
| MTBMA_c14190        | acetyl-CoA decarboxylase/synthase complex, subunit epsilon (EC 1.2.99.2) (cdhB) (169aa)  | 8e-35 relative to MTBMA_c02880 (170aa)  |
| MTBMA_c14230        | HycB-related protein (128aa)                                                             | 1e-18 relative to MTBMA_c03120 (162aa)  |
| MTBMA_c14690        | predicted type I restriction-modification enzyme, subunit R (EC 3.1.21.3) (hsdR) (962aa) | 9e-31 relative to MTBMA_c13260 (1013aa) |
| MTBMA_c14710        | predicted type I restriction-modification enzyme, subunit S (EC 3.1.21.3) (hsdS) (435aa) | 2e-12 relative to MTBMA_c13270 (368aa)  |
| MTBMA_c14720        | predicted type I restriction-modification enzyme, subunit M (EC 3.1.21.3) (hsdM) (671aa) | 4e-36 relative to MTBMA_c13280 (590aa)  |
| MTBMA_c14790        | predicted sensory transduction histidine kinase (662aa)                                  | 2e-49 relative to MTBMA_c12200 (718aa)  |
| MTBMA_c14910        | predicted cobalt transport protein (cbiM) (221aa)                                        | 2e-25 relative to MTBMA_c02860 (216aa)  |

|                     |                                                |                                         |
|---------------------|------------------------------------------------|-----------------------------------------|
| MTBMA_c15870        | predicted pseudomurein-binding protein (839aa) | 0 relative to MTBMA_c11150 (828aa)      |
| MTBMA_c15890        | hypothetical protein (78aa)                    | 6e-20 relative to MTBMA_c11100 (81aa)   |
| MTBMA_c16170        | predicted cell surface glycoprotein (590aa)    | 4e-127 relative to MTBMA_c10780 (683aa) |
| <b>MTBMA_c16770</b> | conserved hypothetical protein (141aa)         | 5e-60 relative to MTBMA_c17310 (159aa)  |
| <b>MTBMA_c17310</b> | conserved hypothetical protein (159aa)         | 7e-60 relative to MTBMA_c16770 (141aa)  |

### Putative partial gene duplication events: two or more homologs in *M. marburgensis* where only one is found in *M. thermautotrophicus*

|                     |                                                                                       |                                                                       |
|---------------------|---------------------------------------------------------------------------------------|-----------------------------------------------------------------------|
| MTBMA_c06660        | acetyl-coenzyme A synthetase (100aa)                                                  | fragment of MTBMA_c01900 (653aa)                                      |
| MTBMA_c08350        | predicted sensory transduction regulatory protein (168aa)                             | fragment of MTBMA_c08430 (277aa)                                      |
| MTBMA_c08460        | hypothetical protein (71aa)                                                           | fragment of MTBMA_c09440 (663aa)                                      |
| MTBMA_c08470        | magnesium chelatase subunit (119aa)                                                   | fragment of MTBMA_c09440 (663aa)                                      |
| MTBMA_c08630        | hypothetical protein (287aa)                                                          | fragment of MTBMA_c08610 (2549aa)                                     |
| MTBMA_c08700        | hypothetical protein (130aa)                                                          | fragmentB relative to MTBMA_c00310 (574aa)/MTBMA_c01890 (524aa)       |
| MTBMA_c08710        | hypothetical protein (237aa)                                                          | fragmentC relative to MTBMA_c00310 (574aa)/MTBMA_c01890 (524aa)       |
| MTBMA_c08930        | predicted tRNA-ribosyltransferase (379aa)                                             | fragment of MTBMA_c06290 (645aa)                                      |
| MTBMA_c10780        | copper chaperone (nitrous oxidase accessory related protein) (683aa)                  | 3e-122 relative to MTBMA_c16170 (590aa) = fragment of MTH716 (1755aa) |
| MTBMA_c13140        | magnesium chelatase subunit related protein (128aa)                                   | fragment of MTBMA_c10550 (604aa)                                      |
| MTBMA_c14200        | acetyl-CoA decarboxylase/synthase complex, alpha subunit (EC 1.2.99.2) (cdhA) (395aa) | fragmentC of MTBMA_c02870 (777aa)                                     |
| MTBMA_c14210        | acetyl-CoA decarboxylase/synthase complex, alpha subunit (EC 1.2.99.2) (cdhA) (311aa) | fragmentB of MTBMA_c02870 (777aa)                                     |
| MTBMA_c14220        | acetyl-CoA decarboxylase/synthase complex, alpha subunit (EC 1.2.99.2) (cdhA) (139aa) | fragmentA of MTBMA_c02870 (777aa)                                     |
| MTBMA_c14610        | predicted cation antiporter (39aa)                                                    | fragment of MTBMA_c15390 (318aa)                                      |
| MTBMA_c15900        | hypothetical protein (187aa)                                                          | fragment of MTBMA_c11130 (316aa)                                      |
| MTBMA_c15910        | tetratricopeptide repeat domain-containing protein (207aa)                            | fragment of MTBMA_c11120 (406aa)                                      |
| <b>MTBMA_c15920</b> | conserved hypothetical protein (147aa)                                                | fragment of MTBMA_c11130 (316aa)                                      |
| MTBMA_c15950        | hypothetical protein (65aa)                                                           | fragment of MTBMA_c11070 (127aa)                                      |
| MTBMA_c16180        | predicted cell surface glycoprotein (510aa)                                           | fragment of MTBMA_c16170 (590aa)                                      |
| MTBMA_c16190        | predicted cell surface glycoprotein (173aa)                                           | fragment of MTBMA_c16170 (590aa)                                      |

### Putative lateral gene transfer events: homologs not found in *M. thermautotrophicus* but in other organisms

|              |                                                                                              |                                                                                                |
|--------------|----------------------------------------------------------------------------------------------|------------------------------------------------------------------------------------------------|
| MTBMA_c00660 | conserved hypothetical protein (628aa)                                                       | 1e-79 relative to ZP_05392980 (505aa) in <i>Clostridium carboxidivorans</i> P7                 |
| MTBMA_c01240 | transposase (163aa)                                                                          | 2e-77 relative to AF1351 (161aa) in <i>Archaeoglobus fulgidus</i> DSM 4304                     |
| MTBMA_c01250 | transposase (165aa)                                                                          | 8e-73 relative to AF1352 (182aa) in <i>Archaeoglobus fulgidus</i> DSM 4304                     |
| MTBMA_c01530 | nitrogenase iron-molybdenum cofactor biosynthesis protein NifX (radical SAM protein) (116aa) | 2e-14 relative to MmarC7_0105 (106aa) in <i>Methanococcus maripaludis</i> C7                   |
| MTBMA_c02220 | conserved hypothetical protein (142aa)                                                       | fragmentA, 9e-10 relative to AF0002 (175aa) in <i>Archaeoglobus fulgidus</i> DSM 4304          |
| MTBMA_c05410 | conserved hypothetical protein (100aa)                                                       | 1e-8 relative to ZP_04878039 (107aa) in <i>Thermococcus barophilus</i> MP                      |
| MTBMA_c05420 | conserved hypothetical protein (122aa)                                                       | 1e-20 relative to ZP_04878104 (135aa) in <i>Thermococcus barophilus</i> MP                     |
| MTBMA_c05620 | conserved hypothetical protein (50aa)                                                        | 5e-06 relative to Msm_1607 (69aa) in <i>Methanobrevibacter smithii</i> ATCC 35061              |
| MTBMA_c06230 | conserved hypothetical protein (292aa)                                                       | 1e-15 relative to MS0879 (327aa) in <i>Mannheimia succiniciproducens</i> MBEL55E               |
| MTBMA_c06240 | predicted glycosyltransferase (EC 2.4.1.-) (378aa)                                           | 3e-18 relative to YP_001048299 (395aa) in <i>Methanoculleus marisnigri</i> JR1                 |
| MTBMA_c06870 | conserved hypothetical protein (199aa)                                                       | 4e-50 relative to RCIX2744 (216aa) in <i>Methanocellales</i> ord. nov.                         |
| MTBMA_c07320 | predicted NADH dehydrogenase (196aa)                                                         | 1e-62 relative to MA0147 (200aa) in <i>Methanosarcina acetivorans</i> C2A                      |
| MTBMA_c07390 | conserved hypothetical protein (624aa)                                                       | 4e-58 relative to Ava_B0090 (706aa) in <i>Anabaena variabilis</i> ATCC 29413                   |
| MTBMA_c07550 | conserved hypothetical protein (98aa)                                                        | 2e-07 relative to Mthe_0505 (113aa) in <i>Methanosaeta thermophila</i> PT                      |
| MTBMA_c07630 | predicted glycosyltransferase (EC 2.4.1.-) (389aa)                                           | 2e-57 relative to MmarC5_1308 (399aa) in <i>Methanococcus maripaludis</i> C5                   |
| MTBMA_c07650 | predicted methyltransferase (EC 2.1.1.-) (314aa)                                             | 2e-14 relative to CA_C3419 (207aa) in <i>Clostridium acetobutylicum</i> ATCC 824               |
| MTBMA_c07660 | conserved hypothetical protein (214aa)                                                       | 7e-10 relative to MA2176 (223aa) in <i>Methanosarcina acetivorans</i> C2A                      |
| MTBMA_c07670 | conserved hypothetical protein (216aa)                                                       | fragment, 7e-14 relative to ZP_06394863 (514aa) in <i>Staphylothermus hellenicus</i> DSM 12710 |
| MTBMA_c07680 | conserved hypothetical protein (266aa)                                                       | fragment, 3e-10 relative to CAJ70955 (533aa) in <i>Candidatus Kuenenia stuttgartiensis</i>     |
| MTBMA_c07710 | glycosyltransferase (EC 2.4.1.-) (378aa)                                                     | 7e-57 relative to Memar_0676 (396aa) in <i>Methanoculleus marisnigri</i> JR1                   |
| MTBMA_c07740 | conserved hypothetical protein (106aa)                                                       | fragmentB, 2e-24 relative to CA_P0044 (331aa) in <i>Clostridium acetobutylicum</i> ATCC 824    |
| MTBMA_c07750 | conserved hypothetical protein (222aa)                                                       | fragmentA, 5e-35 relative to CA_P0044 (331aa) in <i>Clostridium acetobutylicum</i> ATCC 824    |
| MTBMA_c08580 | conserved hypothetical protein (285aa)                                                       | 2e-20 relative to MA3844 (214aa) in <i>Methanosarcina acetivorans</i> C2A                      |

|              |                                         |                                                                                                    |
|--------------|-----------------------------------------|----------------------------------------------------------------------------------------------------|
| MTBMA_c08590 | conserved hypothetical protein (250aa)  | 7e-08 relative to Mhun_2048 (265aa) in <i>Methanospirillum hungatei</i> JF-1                       |
| MTBMA_c08610 | conserved hypothetical protein (2549aa) | 1e-08 relative to Geob_3309 (1946aa) in <i>Geobacter</i> sp. FRC-32                                |
| MTBMA_c08860 | conserved hypothetical protein (81aa)   | 2e-12 relative to mru_1322 (80aa) in <i>Methanobrevibacter ruminantium</i> M1                      |
| MTBMA_c08900 | conserved hypothetical protein (1407aa) | 1e-29 relative to Hbut_1477 (1486aa) in <i>Hyperthermus butylicus</i> DSM 5456                     |
| MTBMA_c08920 | conserved hypothetical protein (364aa)  | 1e-12 relative to Hbut_1538 (384aa) in <i>Hyperthermus butylicus</i> DSM 5456                      |
| MTBMA_c09330 | conserved hypothetical protein (904aa)  | 0 relative to YP_003474347 (851aa) in <i>Thermocrinis albus</i> DSM 14484                          |
| MTBMA_c09350 | helicase domain related protein (774aa) | fragmentB, 0 relative to YP_003474345 (1107aa) in <i>Thermocrinis albus</i> DSM 14484              |
| MTBMA_c09360 | conserved hypothetical protein (294aa)  | fragmentA, 4e-88 relative to YP_003474345 (1107aa) in <i>Thermocrinis albus</i> DSM 14484          |
| MTBMA_c13340 | conserved hypothetical protein (49aa)   | 7e-09 relative to Msm_0432 (50aa) in <i>Methanobrevibacter smithii</i> ATCC                        |
| MTBMA_c14700 | conserved hypothetical protein (286aa)  | 4e-47 relative to ZP_05215240 (275aa) in <i>Mycobacterium avium</i> subsp. <i>avium</i> ATCC 25291 |
| MTBMA_c14740 | conserved hypothetical protein (343aa)  | 1e-39 relative to MFS40622_0544 (310aa) in <i>Methanocaldococcus</i> sp. FS406-22                  |
| MTBMA_c17330 | conserved hypothetical protein (53aa)   | fragmentB, 9e-10 relative to AF0002 (175aa) in <i>Archaeoglobus fulgidus</i> DSM 4304              |

**Supplementary Table 3: The 266 CDS in the genome of *Methanothermobacter thermautotrophicus* not found in the genome of *M. marburgensis* with the "most similar CDS method".** This method allows the use of a sequence in the comparison only once. Neither the second or third best hits nor CDS homologues within the same organism are revealed. A sequence not in common does therefore not mean that there are no paralogs or orthologs of this sequence within the two organisms. The homologues given in the table were also found by considering significant hits (E value cut-off of e-8) to other CDS in *M. marburgensis* and by considering homologues within *M. thermautotrophicus*. It is likely that in *M. thermautotrophicus* some of the identified 47 split genes (see below) are in reality the result of sequencing errors since in *M. marburgensis* of the 145 CDS not in common only 22 were traced back to gene splitting events (Supplementary Table 1).

| CDS                                                                                  | Annotation                                                                  | Homologs                                                                                  |
|--------------------------------------------------------------------------------------|-----------------------------------------------------------------------------|-------------------------------------------------------------------------------------------|
| <b>Putative gene splitting events: neighboring CDS with second or third best hit</b> |                                                                             |                                                                                           |
| MTH113                                                                               | arylsulfatase regulatory protein (108aa)                                    | MTH113 (108aa) + MTH114 (262aa) = MTBMA_c05610 (375aa)                                    |
| MTH216                                                                               | acetyl-CoA synthetase (43aa)                                                | MTH217 (558aa) + MTH216 (43aa) = MTBMA_c01900 (653aa)                                     |
| MTH400                                                                               | energy-converting hydrogenase A, subunit Q1 (ehaQ1) (108aa)                 | MTH400 (108aa) + MTH401 (337aa) = MTBMA_c08000 (407aa)                                    |
| MTH425                                                                               | hypothetical protein (119aa)                                                | MTH425 (119aa) + MTH426 (162aa) = MTBMA_c08210 (294aa)                                    |
| MTH449                                                                               | hypothetical protein (120aa)                                                | MTH448 (231aa) + MTH449 (120aa) = MTBMA_c08440 (361aa)                                    |
| MTH458                                                                               | hypothetical protein (90aa)                                                 | MTH457 (592aa) + MTH458 (90aa) + MTH459 (495aa) = MTBMA_c08500 (1203aa)                   |
| MTH459                                                                               | sensory transduction histidine kinase (495aa)                               | MTH457 (592aa) + MTH458 (90aa) + MTH459 (495aa) = MTBMA_c08500 (1203aa)                   |
| MTH485                                                                               | hypothetical protein (58aa)                                                 | MTH488 (204aa) + MTH487 (1157aa) + MTH486 (176aa) + MTH485 (58aa) = MTBMA_c08800 (1596aa) |
| MTH486                                                                               | hypothetical protein (176aa)                                                | MTH488 (204aa) + MTH487 (1157aa) + MTH486 (176aa) + MTH485 (58aa) = MTBMA_c08800 (1596aa) |
| MTH488                                                                               | hypothetical protein (204aa)                                                | MTH488 (204aa) + MTH487 (1157aa) + MTH486 (176aa) + MTH485 (58aa) = MTBMA_c08800 (1596aa) |
| MTH513                                                                               | hypothetical protein (198aa)                                                | MTH513 (198aa) + MTH514 (1045aa) + MTH515 (181aa) = MTBMA_c09040 (1486aa)                 |
| MTH515                                                                               | hypothetical protein (181aa)                                                | MTH513 (198aa) + MTH514 (1045aa) + MTH515 (181aa) = MTBMA_c09040 (1486aa)                 |
| MTH521                                                                               | hypothetical protein (164aa)                                                | MTH521 (164aa) + MTH522 (60aa) = MTBMA_c09100 (227aa)                                     |
| MTH547                                                                               | hypothetical protein (252aa)                                                | MTH549 (64aa) + MTH548 (365aa) + MTH547 (252aa) = MTBMA_c09390 (707aa)                    |
| MTH549                                                                               | sensory transduction regulatory protein (64aa)                              | MTH549 (64aa) + MTH548 (365aa) + MTH547 (252aa) = MTBMA_c09390 (707aa)                    |
| MTH568                                                                               | hypothetical protein (64aa)                                                 | MTH568 (64aa) + MTH569 (258aa) = MTBMA_c09550 (317aa)                                     |
| MTH582                                                                               | hypothetical protein (110aa)                                                | MTH581 (126aa) + MTH582 (110aa) = MTBMA_c09620 (310aa)                                    |
| MTH702                                                                               | acetyl-CoA synthetase related protein (124aa)                               | MTH701 (425aa) + MTH702 (124aa) = MTBMA_c06650 (548aa)                                    |
| MTH732                                                                               | hypothetical protein (96aa)                                                 | MTH731 (308aa) + MTH732 (96aa) = MTBMA_c11270 (418aa)                                     |
| MTH754                                                                               | hypothetical protein (331aa)                                                | MTH753 (345aa) + MTH754 (331aa) = MTBMA_c11480 (677aa)                                    |
| MTH839                                                                               | hypothetical protein (140aa)                                                | MTH838 (307aa) + MTH839 (140aa) = MTBMA_c12360 (410aa)                                    |
| MTH923                                                                               | hypothetical protein (101aa)                                                | MTH923 (101aa) + MTH922 (111aa) = MTBMA_c13100 (235aa)                                    |
| MTH983                                                                               | hypothetical protein (64aa)                                                 | MTH983 (64aa) + MTH984 (341aa) = MTBMA_c13680 (380aa)                                     |
| MTH988                                                                               | hypothetical protein (113aa)                                                | MTH988 (113aa) + MTH989 (123aa) = MTBMA_c13720 (227aa)                                    |
| MTH1117                                                                              | phosphoenolpyruvate synthase (62aa)                                         | MTH1118 (684aa) + MTH1117 (62aa) = MTBMA_c15010 (756aa)                                   |
| MTH1257                                                                              | hypothetical protein (63aa)                                                 | MTH1257 (63aa) + MTH1258 (567aa) = MTBMA_c16450 (642aa)                                   |
| MTH1278                                                                              | hypothetical protein (104aa)                                                | MTH1278 (104aa) + MTH1279 (234aa) = MTBMA_c16640 (333aa)                                  |
| MTH1340                                                                              | hypothetical protein (113aa)                                                | MTH1341 (62aa) + MTH1340 (113aa) = MTBMA_c17220 (167aa)                                   |
| MTH1384                                                                              | replication factor A related protein (181aa)                                | MTH1385 (622aa) + MTH1384 (181aa) = MTBMA_c17710 (792aa)                                  |
| MTH1420                                                                              | hypothetical protein (121aa)                                                | MTH1419 (432aa) + MTH1420 (121aa) = MTBMA_c00080 (502aa)                                  |
| MTH1429                                                                              | bacitracin resistance protein (106aa)                                       | MTH1429 (106aa) + MTH1428 (181aa) = MTBMA_c00160 (276aa)                                  |
| MTH1450                                                                              | hypothetical protein (205aa)                                                | MTH1450 (205aa) + MTH1451 (236aa) = MTBMA_c00360 (454aa)                                  |
| MTH1466                                                                              | hypothetical protein (128aa)                                                | MTH1466 (128aa) + MTH1465 (123aa) = MTBMA_c00510 (260aa)                                  |
| MTH1469                                                                              | molybdenum ABC transporter, ATP-binding protein (73aa)                      | MTH1470 (131aa) + MTH1469 (73aa) = MTBMA_c00540 (223aa)                                   |
| MTH1472                                                                              | O-antigen transporter-like protein (132aa)                                  | MTH1472 (132aa) + MTH1471 (366aa) = MTBMA_c00550 (518aa)                                  |
| MTH1479                                                                              | metal-dependent phosphoesterase (probable isoleucyl-tRNA synthetase) (85aa) | MTH1478 (154aa) + MTH1479 (85aa) = MTBMA_c00610 (220aa)                                   |

|         |                               |                                                          |
|---------|-------------------------------|----------------------------------------------------------|
| MTH1504 | hypothetical protein (114aa)  | MTH1504 (114aa) + MTH1503 (114aa) = MTBMA_c00890 (223aa) |
| MTH1604 | acetyl-CoA synthetase (249aa) | MTH1603 (400aa) + MTH1604 (249aa) = MTBMA_c01900 (653aa) |
| MTH1647 | hypothetical protein (104aa)  | MTH1646 (237aa) + MTH1647 (104aa) = MTBMA_c02300 (349aa) |
| MTH1688 | hypothetical protein (58aa)   | MTH1688 (58aa) + MTH1687 (151aa) = MTBMA_c02660 (213aa)  |
| MTH1750 | hypothetical protein (59aa)   | MTH1750 (59aa) + MTH1749 (348aa) = MTBMA_c03250 (427aa)  |
| MTH1778 | hypothetical protein (73aa)   | MTH1779 (159aa) + MTH1778 (73aa) = MTBMA_c03540 (241aa)  |
| MTH1782 | hypothetical protein (94aa)   | MTH1782 (94aa) + MTH1783 (154aa) = MTBMA_c03560 (276aa)  |
| MTH1786 | hypothetical protein (101aa)  | MTH1786 (101aa) + MTH1785 (353aa) = MTBMA_c03580 (453aa) |
| MTH1798 | hypothetical protein (65aa)   | MTH1799 (86aa) + MTH1798 (65aa) = MTBMA_c03700 (158aa)   |
| MTH1805 | hypothetical protein (111aa)  | MTH1805 (111aa) + MTH1804 (143aa) = MTBMA_c03750 (314aa) |
| MTH1845 | hypothetical protein (42aa)   | MTH1844 (248aa) + MTH1845 (42aa) = MTBMA_c04150 (295aa)  |

### Putative gene deletion events: no homologs found in *M. thermotrophicus* and any other organism used in the comparison

|        |                              |               |
|--------|------------------------------|---------------|
| MTH58  | hypothetical protein (85aa)  | not found     |
| MTH59  | hypothetical protein (193aa) | not found     |
| MTH60  | fimbrin (176aa)              | not found [4] |
| MTH64  | hypothetical protein (92aa)  | not found     |
| MTH69  | hypothetical protein (85aa)  | not found     |
| MTH85  | hypothetical protein (41aa)  | not found     |
| MTH88  | hypothetical protein (35aa)  | not found     |
| MTH89  | hypothetical protein (59aa)  | not found     |
| MTH90  | hypothetical protein (130aa) | not found     |
| MTH92  | hypothetical protein (70aa)  | not found     |
| MTH98  | hypothetical protein (41aa)  | not found     |
| MTH99  | hypothetical protein (59aa)  | not found     |
| MTH110 | hypothetical protein (82aa)  | not found     |
| MTH186 | hypothetical protein (60aa)  | not found     |
| MTH189 | hypothetical protein (60aa)  | not found     |
| MTH197 | hypothetical protein (62aa)  | not found     |
| MTH202 | hypothetical protein (74aa)  | not found     |
| MTH206 | hypothetical protein (79aa)  | not found     |
| MTH283 | protein kinase (317aa)       | not found     |
| MTH285 | hypothetical protein (351aa) | not found     |
| MTH286 | hypothetical protein (146aa) | not found     |
| MTH288 | hypothetical protein (337aa) | not found     |
| MTH289 | hypothetical protein (499aa) | not found     |
| MTH294 | hypothetical protein (154aa) | not found     |
| MTH295 | hypothetical protein (114aa) | not found     |
| MTH300 | hypothetical protein (46aa)  | not found     |
| MTH302 | hypothetical protein (181aa) | not found     |
| MTH319 | hypothetical protein (53aa)  | not found     |
| MTH320 | hypothetical protein (110aa) | not found     |
| MTH322 | hypothetical protein (36aa)  | not found     |
| MTH350 | hypothetical protein (196aa) | not found     |
| MTH353 | hypothetical protein (212aa) | not found     |
| MTH355 | hypothetical protein (70aa)  | not found     |
| MTH363 | hypothetical protein (273aa) | not found     |
| MTH364 | hypothetical protein (75aa)  | not found     |
| MTH366 | hypothetical protein (49aa)  | not found     |
| MTH407 | hypothetical protein (92aa)  | not found     |
| MTH410 | hypothetical protein (83aa)  | not found     |
| MTH452 | hypothetical protein (184aa) | not found     |

|         |                              |           |
|---------|------------------------------|-----------|
| MTH461  | hypothetical protein (141aa) | not found |
| MTH462  | hypothetical protein (265aa) | not found |
| MTH467  | hypothetical protein (53aa)  | not found |
| MTH493  | hypothetical protein (187aa) | not found |
| MTH565  | hypothetical protein (66aa)  | not found |
| MTH575  | hypothetical protein (54aa)  | not found |
| MTH629  | hypothetical protein (57aa)  | not found |
| MTH640  | hypothetical protein (56aa)  | not found |
| MTH642  | hypothetical protein (65aa)  | not found |
| MTH1102 | hypothetical protein (86aa)  | not found |
| MTH1103 | hypothetical protein (63aa)  | not found |
| MTH1169 | hypothetical protein (48aa)  | not found |
| MTH1209 | hypothetical protein (104aa) | not found |
| MTH1266 | hypothetical protein (79aa)  | not found |
| MTH1333 | hypothetical protein (56aa)  | not found |
| MTH1411 | hypothetical protein (50aa)  | not found |
| MTH1517 | hypothetical protein (85aa)  | not found |
| MTH1518 | hypothetical protein (133aa) | not found |
| MTH1532 | hypothetical protein (194aa) | not found |
| MTH1637 | hypothetical protein (58aa)  | not found |
| MTH1638 | hypothetical protein (155aa) | not found |
| MTH1650 | hypothetical protein (73aa)  | not found |
| MTH1667 | hypothetical protein (46aa)  | not found |
| MTH1771 | hypothetical protein (53aa)  | not found |
| MTH1775 | hypothetical protein (179aa) | not found |
| MTH1800 | hypothetical protein (100aa) | not found |
| MTH1851 | hypothetical protein (63aa)  | not found |
| MTH1899 | hypothetical protein (57aa)  | not found |

**Putative gene duplication events: two or more homologs in *M. thermautotrophicus* where only one is found in *M. marburgensis***

|        |                                                                      |                                    |
|--------|----------------------------------------------------------------------|------------------------------------|
| MTH67  | hypothetical protein (60aa)                                          | 4e-29 relative to MTH82 (60aa)     |
| MTH68  | TPR repeat-containing protein (228aa)                                | 1e-72 relative to MTH72 (403aa)    |
| MTH82  | hypothetical protein (60aa)                                          | 4e-29 relative to MTH67 (60aa)     |
| MTH87  | surface protease related protein (840aa)                             | 0 relative to MTH75 (837aa)        |
| MTH332 | LPS biosynthesis RfbU related protein (400aa)                        | 6e-36 relative to MTH173 (382aa)   |
| MTH333 | GDP-D-mannose dehydratase (348aa)                                    | 4e-21 relative to MTH1789 (336aa)  |
| MTH334 | perosamine synthetase (363aa)                                        | 2e-79 relative to MTH1188 (360aa)  |
| MTH335 | galactosyl-transferase RfpB related protein (373aa)                  | 9e-22 relative to MTH450 (411aa)   |
| MTH338 | LPS biosynthesis RfbU related protein (350aa)                        | 4e-18 relative to MTH450 (411aa)   |
| MTH342 | succinoglycan biosynthesis transport protein (477aa)                 | 1e-54 relative to MTH379 (475aa)   |
| MTH351 | magnesium chelatase subunit (1561aa)                                 | 0 relative to MTH673 (1708aa)      |
| MTH356 | sensory transduction histidine kinase (567aa)                        | 4e-42 relative to MTH174 (785aa)   |
| MTH357 | Conserved hypothetical protein (735aa)                               | 5e-74 relative to MTH412 (583aa)   |
| MTH361 | teichoic acid biosynthesis protein RodC related protein (369aa)      | 5e-1082 relative to MTH365 (409aa) |
| MTH365 | teichoic acid biosynthesis protein RodC related protein (409aa)      | 5e-108 relative to MTH361 (369aa)  |
| MTH370 | LPS biosynthesis RfbU related protein (395aa)                        | 4e-17 relative to MTH450 (411aa)   |
| MTH373 | dTDP-glucose 4,6-dehydratase related protein (334aa)                 | 1e-24 relative to MTH1789 (336aa)  |
| MTH375 | UDP-glucose 4-epimerase related protein (332aa)                      | 1e-38 relative to MTH380 (316aa)   |
| MTH420 | hypothetical protein (676aa)                                         | 1e-65 relative to MTH1906 (711aa)  |
| MTH451 | magnesium chelatase subunit ChII (591aa)                             | 9e-105 relative to MTH556 (395aa)  |
| MTH454 | methyl coenzyme M reductase system, component A2-like protein(480aa) | 4e-35 relative to MTH1015 (540aa)  |
| MTH464 | hypothetical protein (153aa)                                         | 6e-26 relative to MTH408 (139aa)   |

|         |                                                 |                                    |
|---------|-------------------------------------------------|------------------------------------|
| MTH503  | hypothetical protein (107aa)                    | 1e-48 relative to MTH1836 (115aa)  |
| MTH571  | nitrogenase reductase related protein (263aa)   | 1e-23 relative to MTH1120 (273aa)  |
| MTH714  | magnesium chelatase subunit (1787aa)            | 0 relative to MTH673 (1708aa)      |
| MTH715  | hypothetical protein (317aa)                    | 8e-59 relative to MTH717 (446aa)   |
| MTH717  | hypothetical protein (446aa)                    | 7e-55 relative to MTH715 (317aa)   |
| MTH928  | cobalamin biosynthesis protein N (1668aa)       | 0 relative to MTH673 (1708aa)      |
| MTH1172 | cation transporter (407aa)                      | 2e-32 relative to MTH1893 (298aa)  |
| MTH1173 | cell division inhibitor related protein (298aa) | 3e-21 relative to MTH1174 (291aa)  |
| MTH1174 | cell division inhibitor related protein (291aa) | 7e-26 relative to MTH1173 (298aa)  |
| MTH1331 | hypothetical protein (121aa)                    | 6e-61 relative to MTH1652 (121aa)  |
| MTH1346 | hypothetical protein (933aa)                    | 0 relative to MTH674 (966aa)       |
| MTH1364 | hypothetical protein (236aa)                    | 3e-25 relative to MTH526 (228aa)   |
| MTH1653 | hypothetical protein (321aa)                    | 4e-159 relative to MTH1330 (319aa) |
| MTH1780 | stomatin-like protein (297aa)                   | 1e-36 relative to MTH692 (318aa)   |
| MTH1825 | cell surface glycoprotein (674aa)               | 3e-11 relative to MTH719 (574aa)   |
| MTH1898 | oligosaccharyl transferase (672aa)              | 9e-65 relative to MTH1906 (711aa)  |

### Putative partial gene duplication events: two or more homologs in *M. thermotrophicus* where only one is found in *M. marburgensis*

|        |                                                                   |                                             |
|--------|-------------------------------------------------------------------|---------------------------------------------|
| MTH54  | hypothetical protein (212aa)                                      | fragmentD of MTH674 (966aa)/MTH1346 (933aa) |
| MTH55  | hypothetical protein (377aa)                                      | fragmentC of MTH674 (966aa)/MTH1346 (933aa) |
| MTH56  | hypothetical protein (165aa)                                      | fragmentB of MTH674 (966aa)/MTH1346 (933aa) |
| MTH57  | hypothetical protein (127aa)                                      | fragmentA of MTH674 (966aa)/MTH1346 (933aa) |
| MTH65  | hypothetical protein (127aa)                                      | fragment of MTH75 (837aa)/MTH87 (840aa)     |
| MTH66  | hypothetical protein (73aa)                                       | fragment of MTH75 (837aa)/MTH87 (840aa)     |
| MTH70  | hypothetical protein (61aa)                                       | fragment of MTH75 (837aa)/MTH87 (840aa)     |
| MTH71  | hypothetical protein (88aa)                                       | fragment of MTH75 (837aa)/MTH87 (840aa)     |
| MTH84  | hypothetical protein (200aa)                                      | fragment of MTH73 (316aa)                   |
| MTH91  | hypothetical protein (75aa)                                       | fragment of MTH1653 (321aa)/MTH1330 (319aa) |
| MTH94  | hypothetical protein (90aa)                                       | fragment of MTH1653 (321aa)/MTH1330 (319aa) |
| MTH96  | hypothetical protein (189aa)                                      | fragment of MTH1653 (321aa)/MTH1330 (319aa) |
| MTH97  | hypothetical protein (92aa)                                       | fragment of MTH1653 (321aa)/MTH1330 (319aa) |
| MTH282 | hypothetical protein (308aa)                                      | fragment of MTH510 (473aa)                  |
| MTH297 | DNA-dependent RNA polymerase, subunit A' (133aa)                  | fragmentA of MTH1051 (870aa)                |
| MTH298 | DNA-dependent RNA polymerase, subunit A' (89aa)                   | fragmentB of MTH1051 (870aa)                |
| MTH299 | DNA-dependent RNA polymerase, subunit A' (664aa)                  | fragmentC of MTH1051 (870aa)                |
| MTH301 | hypothetical protein (172aa)                                      | fragment of MTH75 (837aa)/MTH87 (840aa)     |
| MTH317 | cobalamin biosynthesis protein N (826aa)                          | fragmentB of MTH1363 (1329aa)               |
| MTH318 | cobalamin biosynthesis protein N (533aa)                          | fragmentA of MTH1363 (1329aa)               |
| MTH359 | hypothetical protein (534aa)                                      | fragment of MTH357 (735aa)                  |
| MTH360 | sensory transduction histidine kinase (700aa)                     | fragment of MTH174 (785aa)                  |
| MTH367 | O-antigen transporter (289aa)                                     | fragment of MTH347 (420aa)                  |
| MTH374 | dolichyl-phosphate mannose synthase related protein (291aa)       | fragment of MTH1392 (564aa)                 |
| MTH377 | dolichyl-phosphate mannose synthase related protein (248aa)       | fragment of MTH1392 (564aa)                 |
| MTH456 | magnesium chelatase subunit (859aa)                               | fragment of MTH1363 (1329aa)                |
| MTH481 | cation-transporting ATPase (404aa)                                | fragment of MTH1001 (844aa)                 |
| MTH482 | cation-transporting ATPase (90aa)                                 | fragment of MTH1001 (844aa)                 |
| MTH496 | endonuclease III-like protein (175aa)                             | fragment of MTH764 (233aa)                  |
| MTH510 | hypothetical protein (473aa)                                      | fragment of MTH282 (308aa)                  |
| MTH531 | UDP-N-acetylmuramyl tripeptide synthetase related protein (312aa) | fragment of MTH530 (682aa)                  |
| MTH555 | magnesium chelatase subunit (182aa)                               | fragmentB of MTH451 (591aa)                 |
| MTH718 | hypothetical protein (73aa)                                       | fragment of MTH720 (388aa)                  |
| MTH719 | cell surface glycoprotein (s-layer protein) (574aa)               | fragment of MTH716 (1755aa)                 |

|         |                                                 |                                             |
|---------|-------------------------------------------------|---------------------------------------------|
| MTH910  | hypothetical protein (216aa)                    | fragment of MTH977 (394aa)                  |
| MTH911  | probable surface protein (698aa)                | fragment of MTH716 (1755aa)                 |
| MTH913  | hypothetical protein (433aa)                    | fragment of MTH674 (966aa)/MTH1346 (933aa)  |
| MTH914  | hypothetical protein (421aa)                    | fragment of MTH674 (966aa)/MTH1346 (933aa)  |
| MTH977  | endo-1,4-beta-glucanase related protein (394aa) | fragment of MTH716 (1755aa)                 |
| MTH1175 | hypothetical protein (124aa)                    | fragment of MTH1172 (407aa)                 |
| MTH1332 | hypothetical protein (189aa)                    | fragment of MTH1653 (321aa)/MTH1330 (319aa) |
| MTH1651 | hypothetical protein (172aa)                    | fragment of MTH1653 (321aa)/MTH1330 (319aa) |

### Putative lateral gene transfer events: homologs not found in *M. marburgensis* but in other organisms

|        |                                                                            |                                                                                                     |
|--------|----------------------------------------------------------------------------|-----------------------------------------------------------------------------------------------------|
| MTH63  | 4-carboxymuconolactone decarboxylase (EC 4.1.1.44) (114aa)                 | 3e-11 relative to MM_0918(165aa) in <i>Methanosarcina mazei</i> Go1                                 |
| MTH196 | ATPase (458aa)                                                             | 3e-178 relative to ZP_04879563 (464aa) in <i>Thermococcus</i> sp. AM4                               |
| MTH276 | hypothetical protein (128aa)                                               | fragment, 6e-08 relative to MCP_0354 (588aa) in <i>Methanocella paludicola</i> SANAE                |
| MTH284 | ATP-dependent Clp protease regulatory subunit (616aa)                      | 4e-76 relative to ZP_06025640 (616aa) in <i>Fusobacterium periodonticum</i> ATCC 33693              |
| MTH287 | anaerobic ribonucleoside-triphosphate reductase activating protein (237aa) | 2e-34 relative to CLD_3564 (201aa) in <i>Clostridium botulinum</i> B1 str. Okra                     |
| MTH293 | conserved hypothetical protein (177aa)                                     | 9e-56 relative to ZP_05030251 (171aa) in <i>Microcoleus chthonoplastes</i> PCC 7420                 |
| MTH296 | conserved hypothetical protein (419aa)                                     | 2e-54 relative to mru_0788 (317aa) in <i>Methanobrevibacter ruminantium</i> M1                      |
| MTH303 | conserved hypothetical protein (345aa)                                     | 9e-14 relative to CBH37168 (506aa) in uncultured archaeon                                           |
| MTH306 | conserved hypothetical protein (339aa)                                     | 1e-28 relative to ZP_03607154 (352aa) in <i>Methanobrevibacter smithii</i> DSM 2375                 |
| MTH315 | histidine kinase-like ATPases (254aa)                                      | 5e-80 relative to psiM100p09 (252aa) in Methanothermobacter phage psiM100                           |
| MTH316 | conserved hypothetical protein (114aa)                                     | 1e-23 relative to psiM100p10 (107aa) in Methanothermobacter phage psiM100                           |
| MTH323 | conserved hypothetical protein (300aa)                                     | 5e-93 relative to Tlet_1201 (300aa) in <i>Thermotoga lettingae</i> TMO                              |
| MTH324 | conserved hypothetical protein (113aa)                                     | 1e-29 relative to Tlet_1200 (122aa) in <i>Thermotoga lettingae</i> TMO                              |
| MTH325 | CRISPR-associated RAMP protein, Cmr4 family (287aa)                        | 5e-82 relative to Tlet_1199 (286aa) in <i>Thermotoga lettingae</i> TMO                              |
| MTH326 | CRISPR-associated protein, Csx11 family (957aa)                            | 0 relative to Tlet_1205 (1218aa) in <i>Thermotoga lettingae</i> TMO                                 |
| MTH327 | predicted CRISPR-associated RAMP protein (261aa)                           | 1e-63 relative to Tlet_1203 (282aa) in <i>Thermotoga lettingae</i> TMO                              |
| MTH328 | CRISPR-associated RAMP protein, Cmr1 family (251aa)                        | 3e-26 relative to Tlet_1202 (335aa) in <i>Thermotoga lettingae</i> TMO                              |
| MTH329 | conserved hypothetical protein (184aa)                                     | 2e-29 relative to mru_1525 (258aa) in <i>Methanobrevibacter ruminantium</i> M1                      |
| MTH336 | conserved hypothetical protein (173aa)                                     | 3e-10 relative to ZP_06192739 (173aa) in <i>Serratia odorifera</i> 4Rx13                            |
| MTH337 | conserved hypothetical protein (301aa)                                     | 6e-51 relative to CHY_2660 (326aa) in <i>Carboxydotherrmus hydrogenoformans</i> Z-2901              |
| MTH340 | polysaccharide pyruvyl transferase CsaB (400aa)                            | 1e-62 relative to Memar_0956 (407aa) in <i>Methanoculleus marisnigri</i> JR1                        |
| MTH341 | coenzyme F420-reducing hydrogenase, beta subunit homolog (406aa)           | 7e-76 relative to DET0214 (428aa) in <i>Dehalococcoides ethenogenes</i> 195                         |
| MTH345 | pyruvate formate-lyase 2 activating enzyme (288aa)                         | 8e-44 relative to ZP_02993369 (300aa) in <i>Clostridium sporogenes</i> ATCC 15579                   |
| MTH346 | formate acetyltransferase 2 (pyruvate formate lyase) (642aa)               | 2e-105 relative to DSY3016 (626aa) in <i>Desulfitobacterium hafniense</i> Y51                       |
| MTH352 | conserved hypothetical protein (131aa)                                     | 4e-30 relative to CBH36703 (122aa) in uncultured archaeon                                           |
| MTH354 | conserved hypothetical protein (297aa)                                     | 2e-31 relative to ZP_04929371 (359aa) in <i>Pseudomonas aeruginosa</i> C3719                        |
| MTH358 | glutathione-regulated K <sup>+</sup> /H <sup>+</sup> antiporter (512aa)    | 1e-115 relative to Dole_0855 (674aa) in <i>Desulfococcus oleovorans</i> Hxd3                        |
| MTH362 | capsular polysaccharide biosynthesis protein (405aa)                       | 2e-36 relative to MJ1059 (406aa) in <i>Methanocaldococcus jannaschii</i> DSM 2661                   |
| MTH368 | glycerol-3-phosphate dehydrogenase (NAD) (321aa)                           | 1e-46 relative to ZP_03607422 (321aa) in <i>Methanobrevibacter smithii</i> DSM 2375                 |
| MTH369 | UDP-N-acetylglucosamine pyrophosphorylase related protein (231aa)          | 2e-53 relative to DvMF_1841 (225aa) in <i>Desulfovibrio vulgaris</i> str. 'Miyazaki F'              |
| MTH371 | conserved hypothetical protein fragmentA (245aa)                           | 5e-32 relative to Msp_0616 (540aa) in <i>Methanosphaera stadtmanae</i> DSM 3091                     |
| MTH372 | conserved hypothetical protein fragmentB (287aa)                           | 7e-16 relative to Msp_0616 (540aa) in <i>Methanosphaera stadtmanae</i> DSM 3091                     |
| MTH453 | cobalt transport protein (252aa)                                           | 6e-16 relative to Dtox_2654 (231aa) in <i>Desulfotomaculum acetoxidans</i> DSM 771                  |
| MTH455 | hypothetical protein (261aa)                                               | fragment, 2e-15 relative to Daud_1210 (1210aa) in <i>Candidatus Desulfurudis audaxviator</i> MP104C |
| MTH495 | modification methyltransferase, cytosine-specific (413aa)                  | 8e-106 relative to MM_0278 (423aa) in <i>Methanosarcina mazei</i> Gö1                               |
| MTH497 | Superfamily II DNA and RNA helicase (1235aa)                               | 0 relative to MM_0276 (1275aa) in <i>Methanosarcina mazei</i> Gö1                                   |
| MTH498 | conserved hypothetical protein (578aa)                                     | 1e-114 relative to MM_0275 (600aa) in <i>Methanosarcina mazei</i> Gö1                               |
| MTH499 | conserved hypothetical protein (971aa)                                     | 3e-97 relative to MM_0273 (1009aa) in <i>Methanosarcina mazei</i> Gö1                               |
| MTH501 | 5-methylcytosine-specific restriction enzyme McrB related protein (546aa)  | fragment, 2e-82 relative to mru_0062 (922aa) in <i>Methanobrevibacter ruminantium</i> M1            |
| MTH502 | conserved hypothetical protein (567aa)                                     | 2e-78 relative to mru_0063 (547aa) in <i>Methanobrevibacter ruminantium</i> M1                      |
| MTH551 | DNA helicase II related protein (853aa)                                    | 7e-55 relative to ZP_01877893 (621aa) in <i>Roseovarius</i> sp. TM1035                              |
| MTH864 | transcriptional regulator, ArsR family (250aa)                             | 5e-62 relative to RCIX2193 (250aa) in <i>Methanocella paludicola</i>                                |



|         |                                                                          |                                                                                           |
|---------|--------------------------------------------------------------------------|-------------------------------------------------------------------------------------------|
| MTH865  | conserved hypothetical protein (81aa)                                    | 5e-24 relative to Maeo_0093 (79aa) in <i>Methanococcus aeolicus</i> Nankai-3              |
| MTH909  | conserved hypothetical protein (182aa)                                   | 2e-16 relative to ZP_04876511 (164aa) in <i>Thermococcus barophilus</i> MP                |
| MTH912  | predicted metallo-beta-lactamase (521aa)                                 | 2e-90 relative to CENSYa_0006 (496aa) in <i>Cenarchaeum symbiosum</i> A                   |
| MTH927  | ferredoxin (77aa)                                                        | 8e-09 relative to Msm_0784 (63aa) in <i>Methanobrevibacter smithii</i> ATCC 35061         |
| MTH1076 | CRISPR-associated protein TIGR02710 family (400aa)                       | 3e-51 relative to mru_1188 (429aa) in <i>Methanobrevibacter ruminantium</i> M1            |
| MTH1077 | CRISPR-associated RAMP protein Csm5 family (75aa)                        | fragmentB, 1e-06 relative to mru_1179 (400aa) in <i>Methanobrevibacter ruminantium</i> M1 |
| MTH1078 | CRISPR-associated RAMP protein, Csm5 family (286aa)                      | fragmentA, 2e-09 relative to mru_1179 (400aa) in <i>Methanobrevibacter ruminantium</i> M1 |
| MTH1079 | CRISPR-associated RAMP protein, Csm4 family (302aa)                      | 1e-42 relative to mru_1180 (331aa) in <i>Methanobrevibacter ruminantium</i> M1            |
| MTH1080 | CRISPR-associated RAMP protein, Csm3 family (245aa)                      | 2e-53 relative to mru_1181 (255aa) in <i>Methanobrevibacter ruminantium</i> M1            |
| MTH1081 | CRISPR-associated protein, Csm2 family (140aa)                           | 5e-18 relative to mru_1182 (143aa) in <i>Methanobrevibacter ruminantium</i> M1            |
| MTH1082 | CRISPR-associated protein, Csm1 family (822aa)                           | 5e-173 relative to mru_1183 (885aa) in <i>Methanobrevibacter ruminantium</i> M1           |
| MTH1083 | CRISPR-associated protein Cas2 (91aa)                                    | 1e-19 relative to mru_0799 (88aa) in <i>Methanobrevibacter ruminantium</i> M1             |
| MTH1084 | CRISPR-associated protein Cas1 (334aa)                                   | 2e-125 relative to mru_0798 (322aa) in <i>Methanobrevibacter ruminantium</i> M1           |
| MTH1085 | CRISPR-associated protein Cas4 (175aa)                                   | 2e-35 relative to mru_0797 (168aa) in <i>Methanobrevibacter ruminantium</i> M1            |
| MTH1086 | CRISPR-associated protein Cas3 (830aa)                                   | 2e-171 relative to ZP_04880468 (868aa) in <i>Thermococcus</i> sp. AM4                     |
| MTH1087 | CRISPR-associated protein Cas5 (269aa)                                   | 1e-53 relative to ZP_04880232 (275aa) in <i>Thermococcus</i> sp. AM4                      |
| MTH1088 | CRISPR-associated autoregulator DevR (391aa)                             | 3e-120 relative to ZP_04880262 (393aa) in <i>Thermococcus</i> sp. AM4                     |
| MTH1089 | conserved hypothetical protein (105aa)                                   | 5e-17 relative to ZP_04880306 (100aa) in <i>Thermococcus</i> sp. AM4                      |
| MTH1090 | conserved hypothetical protein (598aa)                                   | 7e-83 relative to ZP_04880496 (636aa) in <i>Thermococcus</i> sp. AM4                      |
| MTH1091 | CRISPR-associated protein Cas6 (154aa)                                   | 3e-31 relative to mru_0792 (243aa) in <i>Methanobrevibacter ruminantium</i> M1            |
| MTH1176 | predicted archeal iron-sulfur cluster carrier protein ApbC/Npb35 (276aa) | 6e-71 relative to Msp_0283 (285aa) in <i>Methanosphaera stadtmanae</i> DSM 3091           |
| MTH1177 | dinitrogenase iron-molybdenum cofactor biosynthesis protein (116aa)      | 4e-17 relative to Mbar_A1833 (125aa) in <i>Methanosarcina barkeri</i> str. Fusaro         |
| MTH1365 | 4Fe-4S ferredoxin iron-sulfur binding domain-containing protein (106aa)  | 3e-36 relative to Mthe_1417 (102aa) in <i>Methanosaeta thermophila</i> PT                 |
| MTH1366 | conserved hypothetical protein (68aa)                                    | 5e-06 relative to Ferp_0201 (97aa) in <i>Ferroglobus placidus</i> DSM 10642               |
| MTH1625 | conserved hypothetical protein (86aa)                                    | 9e-09 relative to mru_0389 (81aa) in <i>Methanobrevibacter ruminantium</i> M1             |
| MTH1716 | hypothetical protein (229aa)                                             | fragment, 2e-19 relative to ZP_04878004 (813aa) in <i>Thermococcus barophilus</i> MP      |
| MTH1717 | conserved hypothetical protein (557aa)                                   | 3e-95 relative to ZP_04878004 (813aa) in <i>Thermococcus barophilus</i> MP                |
| MTH1719 | conserved hypothetical protein (74aa)                                    | fragment, 4e-06 relative to CBH38353 (895aa) in uncultured archaeon                       |
| MTH1725 | conserved hypothetical protein (92aa)                                    | 6e-23 relative to CBH39270 (89aa) in uncultured archaeon                                  |
| MTH1892 | conserved hypothetical protein (168aa)                                   | 4e-15 relative to CBH38812 (165aa) in uncultured archaeon                                 |
